# Supplementary figures and images for: HOXA9 promotes proliferation, metastasis and prevents apoptosis in hepatocellular carcinoma
Source: PubMed Central journal article supplement — J Cancer Res Clin Oncol. 2024 Sep 18;150(9):422. doi: 10.1007/s00432-024-05950-9 (PMC11410850; doi:10.1007/s00432-024-05950-9), 2024-09-18

**Figure 2A**

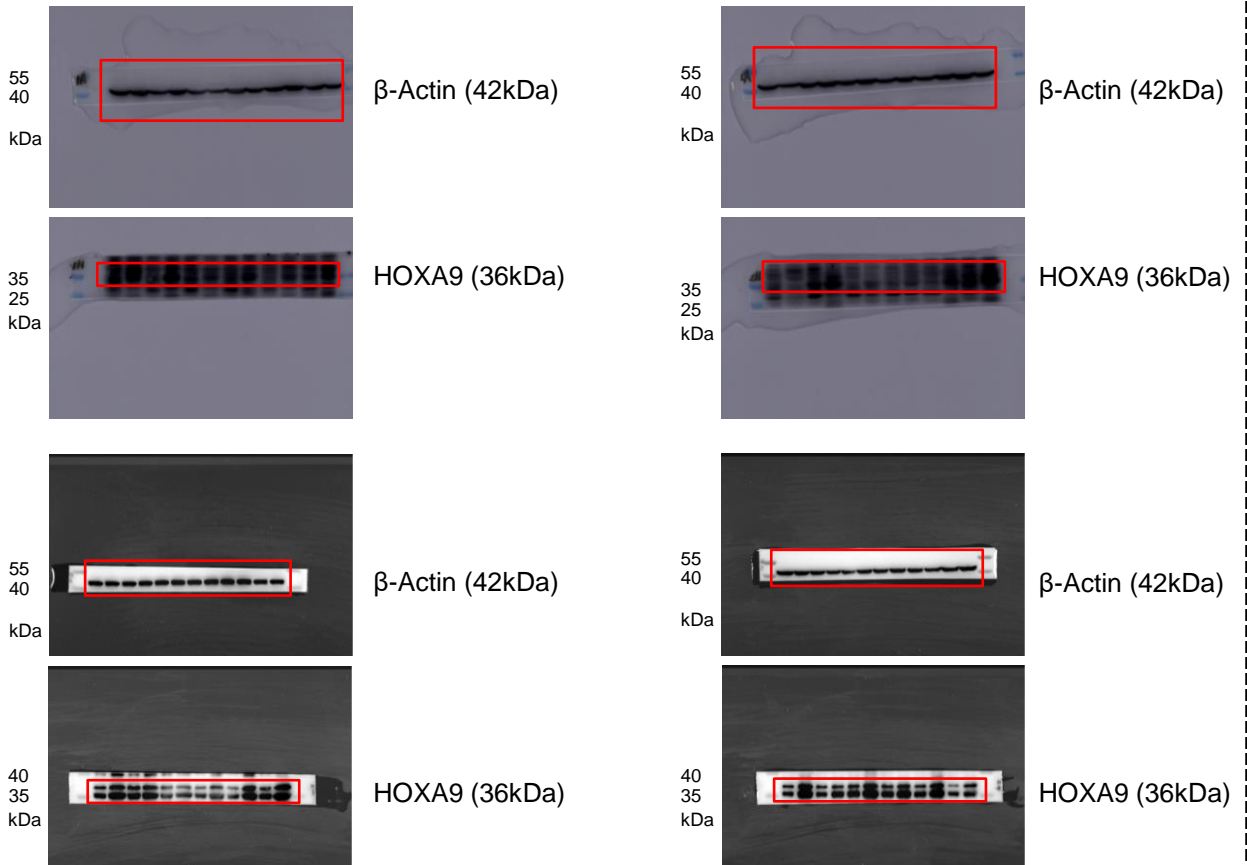

**Figure 2C**

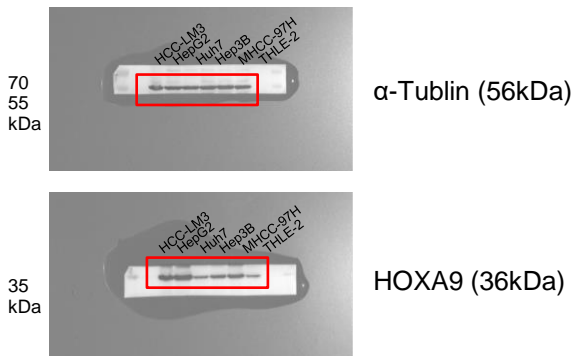

**Figure 3A**

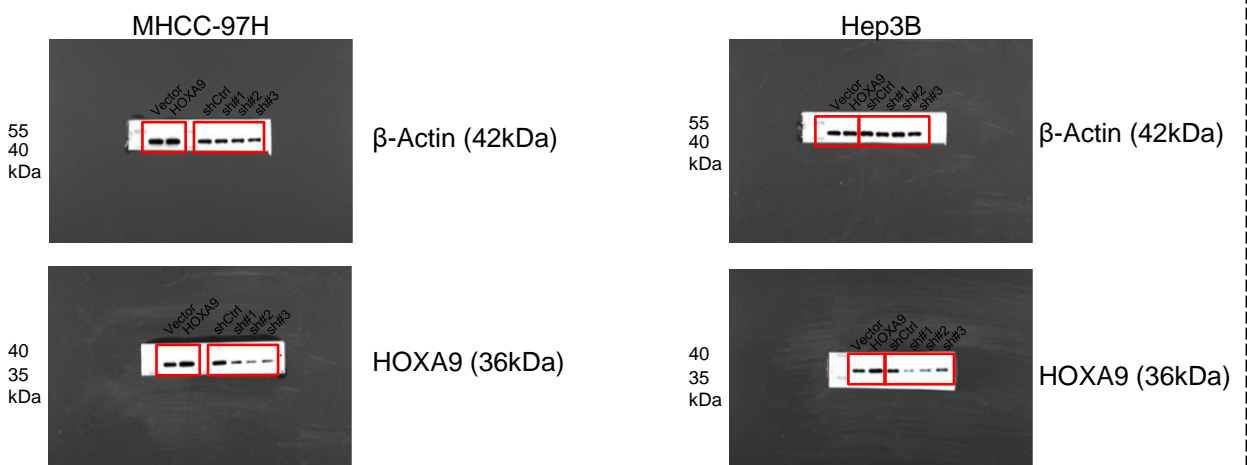

**Figure 4D**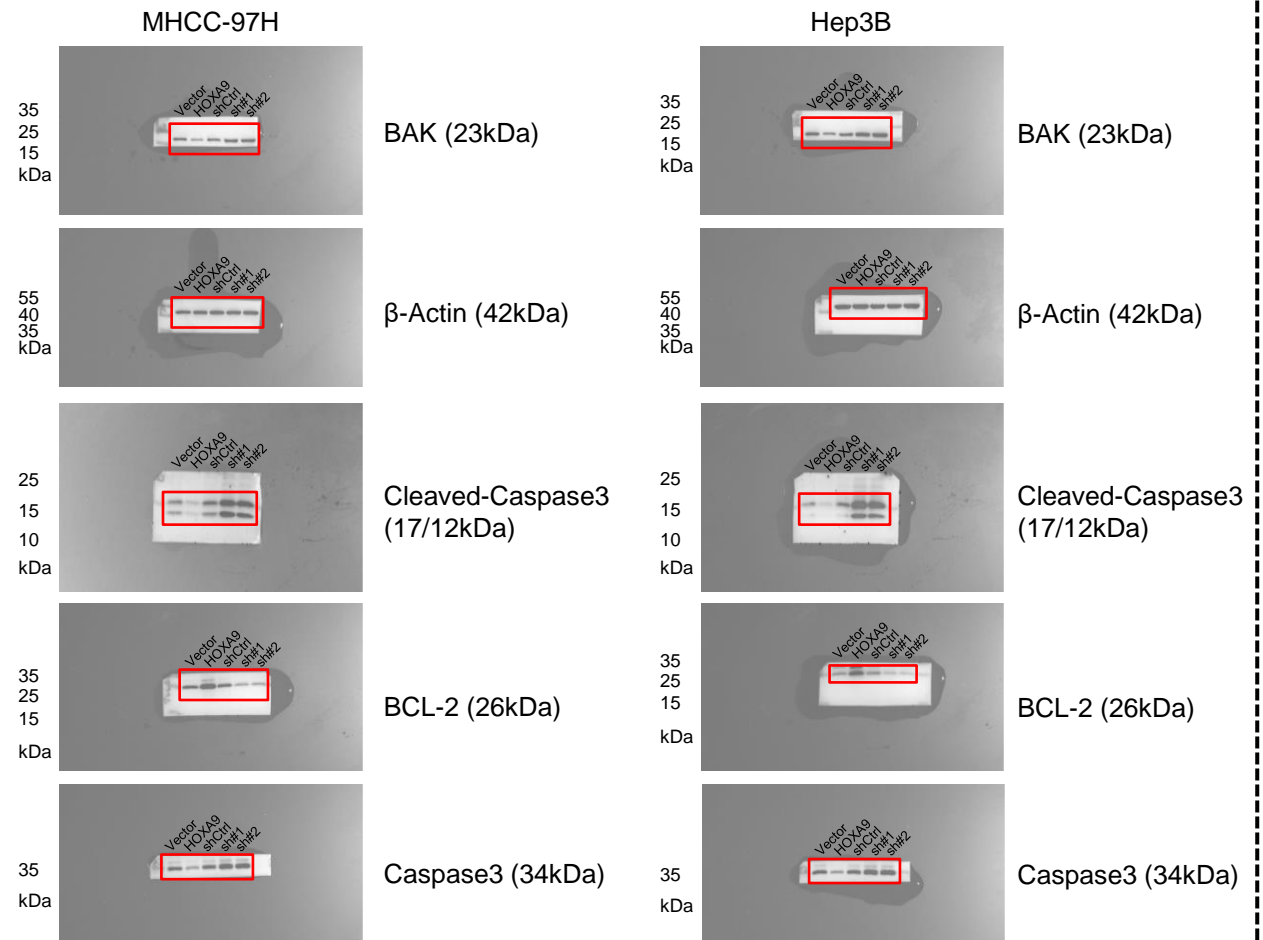**Figure 5A, B**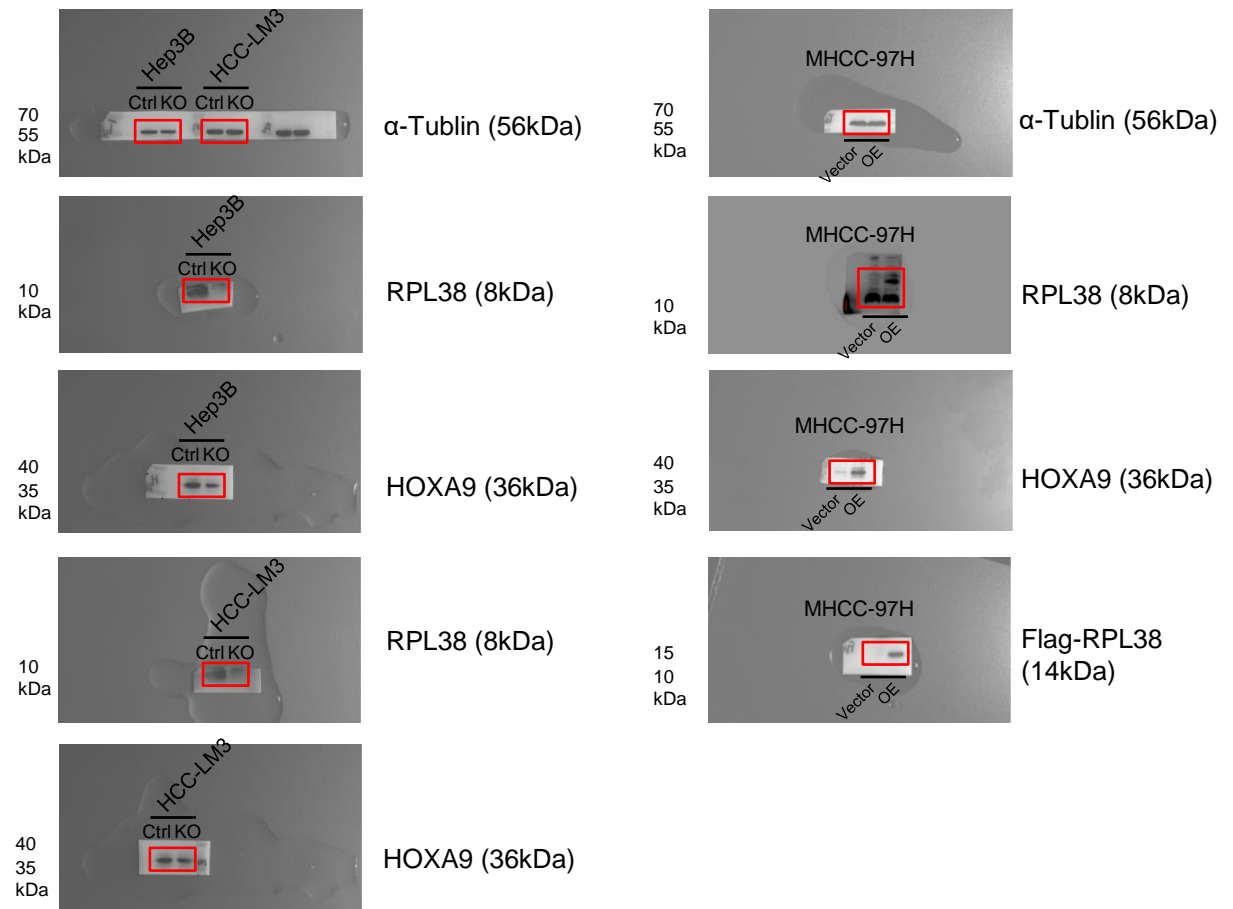

Supplement: 432_2024_5950_MOESM7_ESM.pdf [file 432_2024_5950_MOESM7_ESM.pdf]
